# Supplementary material for: Molecular Diversity of Mycobacterium avium subsp. paratuberculosis in Four Dairy Goat Herds from Thuringia (Germany)
Source: MDPI journal article supplement (doi:10.3390/ani13223542), 2023-11-16
Supplement: s1 [file s1]

## Supplemented Material

**Table S1.** *Mycobacterium avium* subsp. *paratuberculosis* isolates (n = 133) from feces of 120 female goats and one buck belonging to herd 1 in Thuringia (Germany) and their respective genotyping results

| Sampling | N° | Isolate  | Goat N°      | Birth year | Genotype <sup>a</sup> |
|----------|----|----------|--------------|------------|-----------------------|
| 2018     | 1  | 18MA0379 | 01548        | 2007       | T1 <sup>b</sup>       |
|          | 2  | 18MA0188 | 81696        | 2008       | T1                    |
|          | 3  | 18MA0473 | 81704        | 2008       | T1                    |
|          | 4  | 18MA0354 | 01865        | 2009       | T1                    |
|          | 5  | 18MA0457 | 01866        | 2009       | T1                    |
|          | 6  | 18MA0285 | 50041        | 2009       | T1                    |
|          | 7  | 18MA0370 | 07267        | 2010       | T1                    |
|          | 8  | 18MA0133 | 07273        | 2010       | T1                    |
|          | 9  | 18MA0434 | 43936        | 2010       | T1                    |
|          | 10 | 18MA0143 | 43938        | 2010       | T1                    |
|          | 11 | 18MA0331 | 07329        | 2011       | T1                    |
|          | 12 | 18MA0400 | 07353        | 2011       | T1                    |
|          | 13 | 18MA0464 | 84924        | 2011       | T2 <sup>c</sup>       |
|          | 14 | 18MA0440 | 16984        | 2012       | T1                    |
|          | 15 | 18MA0323 | 16988        | 2012       | T1                    |
|          | 16 | 18MA0345 | 51580        | 2013       | T1                    |
|          | 17 | 18MA0338 | 80938        | 2014       | T1                    |
|          | 18 | 18MA0123 | 80947        | 2014       | T1                    |
|          | 19 | 18MA0114 | 80951        | 2014       | T1                    |
|          | 20 | 18MA0118 | 80956        | 2014       | T1                    |
|          | 21 | 18MA0363 | 80958        | 2014       | T1                    |
|          | 22 | 18MA0317 | 80962        | 2014       | T1                    |
|          | 23 | 18MA0383 | 80966        | 2014       | T1                    |
|          | 24 | 18MA0364 | 80986        | 2014       | T1                    |
|          | 25 | 18MA0318 | 81002        | 2014       | T1                    |
|          | 26 | 18MA0409 | <u>81014</u> | 2014       | T1                    |
|          | 27 | 18MA0462 | 81027        | 2014       | T1                    |
|          | 28 | 18MA0337 | 58000        | 2015       | T1                    |
|          | 29 | 18MA0321 | 58002        | 2015       | T1                    |
|          | 30 | 18MA0280 | 58011        | 2015       | T1                    |

|      |    |                       |              |      |                 |
|------|----|-----------------------|--------------|------|-----------------|
| 2020 | 31 | 18MA0155              | 58020        | 2015 | T1              |
|      | 32 | 18MA0439              | 58024        | 2015 | T1              |
|      | 33 | 18MA0420              | 58029        | 2015 | T1              |
|      | 34 | 18MA0456              | 58033        | 2015 | T1              |
|      | 35 | 18MA0303              | 58034        | 2015 | T1              |
|      | 36 | 18MA0394              | 58038        | 2015 | T1              |
|      | 37 | 18MA0190              | <u>58039</u> | 2015 | T1              |
|      | 38 | 18MA0113              | 58043        | 2015 | T1              |
|      | 39 | 18MA0402              | 58052        | 2015 | T1              |
|      | 40 | 18MA0112              | 45803        | 2016 | T1              |
|      | 41 | 18MA0092              | <u>45828</u> | 2016 | T1              |
|      | 42 | 18MA0152              | 45832        | 2016 | T1              |
|      | 43 | 18MA0171              | 45893        | 2016 | T1              |
|      | 44 | 18MA0101              | 45915        | 2016 | T1              |
|      | 45 | 18MA0385              | 45927        | 2016 | T1              |
|      | 46 | 18MA0427              | 45932        | 2016 | T1              |
|      | 47 | 18MA0357              | 45945        | 2016 | T1              |
|      | 48 | 18MA0088              | 45969        | 2016 | T1              |
|      | 49 | 18MA0347              | 45985        | 2016 | T1              |
|      | 50 | 18MA0090              | 45993        | 2016 | T1              |
|      | 51 | 18MA1444              | 09142        | 2017 | T1              |
|      | 52 | 18MA1406              | <u>09149</u> | 2017 | T1              |
|      | 53 | 18MA1403              | 09173        | 2017 | T1              |
|      | 54 | 18MA1467              | 09194        | 2017 | T1              |
|      | 55 | 18MA1482              | <u>45859</u> | 2017 | T1              |
|      | 56 | 18MA1448              | 45902        | 2017 | T1              |
|      | 57 | 18MA1457              | 45921        | 2017 | T1              |
|      | 1  | 20MA1306              | <u>80949</u> | 2014 | T1              |
|      | 2  | 20MA0392              | 80965        | 2014 | T1              |
|      | 3  | 20MA0472 <sup>e</sup> | <u>80967</u> | 2014 | T3 <sup>d</sup> |
|      | 4  | 20MA0979 <sup>f</sup> | <u>80967</u> | 2014 | T3              |
|      | 5  | 20MA1199              | 80975        | 2014 | T1              |
|      | 6  | 20MA0288              | 80976        | 2014 | T1              |
|      | 7  | 20MA0991              | 80984        | 2014 | T1              |
|      | 8  | 20MA1011              | <u>81014</u> | 2014 | T1              |
|      | 9  | 20MA1327              | <u>81024</u> | 2014 | T2              |
|      | 10 | 20MA0362              | 58031        | 2015 | T1              |

|      |    |          |              |      |           |
|------|----|----------|--------------|------|-----------|
|      | 11 | 20MA0424 | 58041        | 2015 | T1        |
|      | 12 | 20MA0282 | 58055        | 2015 | T1        |
|      | 13 | 20MA0999 | 58056        | 2015 | T1        |
|      | 14 | 20MA1614 | 59546*       | 2015 | T1        |
|      | 15 | 20MA1171 | 45800        | 2016 | T1        |
|      | 16 | 20MA0328 | 45809        | 2016 | T1        |
|      | 17 | 20MA1012 | 45898        | 2016 | T1        |
|      | 18 | 20MA0975 | 45917        | 2016 | T1        |
|      | 19 | 20MA0343 | <u>45931</u> | 2016 | T1        |
|      | 20 | 20MA1257 | <u>09166</u> | 2017 | T1        |
|      | 21 | 20MA0377 | 45842        | 2017 | T1        |
|      | 22 | 20MA0206 | 45855        | 2017 | T1        |
|      | 23 | 20MA1293 | <u>45990</u> | 2017 | T1        |
|      | 24 | 20MA0345 | 72012        | 2018 | T1        |
|      | 25 | 20MA0273 | 72026        | 2018 | T1        |
|      | 26 | 20MA0348 | 72027        | 2018 | T1        |
|      | 27 | 20MA1282 | 72038        | 2018 | T1        |
|      | 28 | 20MA0326 | 72073        | 2018 | T1        |
|      | 29 | 20MA0231 | 72051        | 2018 | T1        |
|      | 30 | 20MA0975 | 72073        | 2018 | T1        |
|      | 31 | 20MA0292 | 72081        | 2018 | T1        |
|      | 32 | 20MA0417 | 72086        | 2018 | T1        |
|      | 33 | 20MA1467 | 72101        | 2018 | T1        |
|      | 34 | 20MA0208 | 72126        | 2018 | T1        |
|      | 35 | 20MA0224 | 72133        | 2018 | T1        |
|      | 36 | 20MA1428 | 72437        | 2019 | T1        |
|      | 37 | 20MA1262 | 72474        | 2019 | T1        |
|      | 38 | 20MA1484 | 17307        | 2020 | T1        |
|      | 39 | 20MA1606 | 17344        | 2020 | T1        |
| 2021 | 1  | 21MA1548 | <u>80949</u> | 2014 | T1        |
|      | 2  | 21MA0066 | 81013        | 2014 | T1        |
|      | 3  | 21MA0054 | <u>81024</u> | 2014 | <b>T2</b> |
|      | 4  | 21MA0146 | 58004        | 2015 | T1        |
|      | 5  | 21MA1567 | 58021        | 2015 | T1        |
|      | 6  | 21MA1556 | 58023        | 2015 | T1        |
|      | 7  | 21MA0115 | 58032        | 2015 | T1        |
|      | 8  | 21MA0744 | <u>58039</u> | 2015 | T1        |

|      |    |                       |              |      |    |
|------|----|-----------------------|--------------|------|----|
|      | 9  | 21MA1513              | <u>45828</u> | 2016 | T1 |
|      | 10 | 21MA1557              | 45880        | 2016 | T1 |
|      | 11 | 21MA0145              | 45883        | 2016 | T1 |
|      | 12 | 21MA0124              | 45899        | 2016 | T1 |
|      | 13 | 21MA1582              | 45971        | 2016 | T1 |
|      | 14 | 21MA1521              | <u>09149</u> | 2017 | T1 |
|      | 15 | 21MA0028              | 09153        | 2017 | T1 |
|      | 16 | 21MA0584              | <u>09166</u> | 2017 | T1 |
|      | 17 | 21MA0123              | 09170        | 2017 | T1 |
|      | 18 | 21MA0755              | 13766        | 2017 | T1 |
|      | 19 | 21MA0098              | 13770        | 2017 | T1 |
|      | 20 | 21MA0849              | <u>45859</u> | 2017 | T1 |
|      | 21 | '21MA0060             | 45903        | 2017 | T1 |
|      | 22 | 21MA0540              | <u>45931</u> | 2017 | T1 |
|      | 23 | 21MA0681              | 45939        | 2017 | T1 |
|      | 24 | 21MA0805              | 45964        | 2017 | T1 |
|      | 25 | 21MA1505              | 45982        | 2017 | T1 |
|      | 26 | 21MA2262              | 72059        | 2018 | T1 |
|      | 27 | 21MA0857              | 72192        | 2019 | T1 |
|      | 28 | 21MA2086              | 17389        | 2020 | T1 |
|      | 29 | 21MA2214              | 17406        | 2020 | T3 |
| 2022 | 1  | 22MA0971              | <u>45990</u> | 2017 | T1 |
|      | 2  | 22MA1102              | 72025        | 2018 | T1 |
|      | 3  | 22MA1969              | 72028        | 2018 | T1 |
|      | 4  | 22MA2038              | 72099        | 2018 | T1 |
|      | 5  | 22MA1148 <sup>s</sup> | <u>72120</u> | 2018 | T1 |
|      | 6  | 22MA2046 <sup>h</sup> | <u>72120</u> | 2018 | T1 |
|      | 7  | 22MA2161              | 17338        | 2020 | T1 |
|      | 8  | 22MA2101              | 17423        | 2020 | T1 |

<sup>a</sup> Genotype of isolates comprises combined of results of three typing methods: (1) mycobacterial interspersed repetitive unit-variable number of tandem repeat (MIRU-VNTR)-typing according to [40] with resulting profiles designated according to INRA Nouzilly MIRU-VNTR (INMV) nomenclature deposited in the INMV database (<http://mac-inmv.tours.inra.fr>), (2) short sequence repeat (SSR) analysis according to [63] with profiles representing the repeat numbers at specific target sites of G1 (SSR1), GGT (SSR8), and TGC (SSR9), and (3) SNP based assay according to [38] resulting in assignment of strain to phylogenetic groups; <sup>b</sup> Genotype T1 includes profile: INMV1 / 7-4-4 / Clade 9; <sup>c</sup> Genotype T2 includes profile: INMV33 / 7-4-4 / Subgroup B; <sup>d</sup> Genotype T3 includes profile: INMV2

/ 7-4-4 / Clade 1; \* Buck; Underlined – goats (n = 12) of which two isolates were genotyped. <sup>e</sup> isolated in April 2020, <sup>f</sup> isolated in July 2020, <sup>g</sup> isolated in May 2022, <sup>h</sup> isolated in November 2022

**Table S2.** *Mycobacterium avium* subsp. *paratuberculosis* isolates of goats and their environment from different Thuringian herds (herd 2 to 4) and their respective genotypes

| Herd | Sampling | Isolate         | Origin             | Genotype <sup>a</sup> |
|------|----------|-----------------|--------------------|-----------------------|
| 2    | 2019     | 19MA0520        | Feces              | T4 <sup>b</sup>       |
|      |          | 19MA0523        | Feces              | T4                    |
|      |          | 19MA0524        | Feces              | T4                    |
|      |          | 19MA0541        | Feces              | T4                    |
|      |          | 19MA0552        | Feces              | T4                    |
|      | 2022     | 22MA1240        | Feces              | T4                    |
|      |          | 22MA0076        | Feces              | T4                    |
| 3    | 2017     | <u>17MA0621</u> | Feces              | T5 <sup>c</sup>       |
|      |          | <u>17MA0656</u> | Feces              | T5                    |
|      | 2022     | 22MA0039        | Feces, bulk sample | T5                    |
| 4    | 2017     | 17MA0283        | Feces              | T6 <sup>d</sup>       |
|      |          | 17MA0699        | Feces              | T6                    |
|      |          | 17MA0704        | Feces              | T6                    |
|      |          | 17MA1022        | Bedding            | T6                    |
|      |          | 17MA1023        | Bedding            | T6                    |
|      |          | 17MA1024        | Bedding            | T6                    |
|      |          | 17MA1025        | Bedding            | T6                    |
|      |          | 17MA1026        | Bedding            | T6                    |
|      |          | 17MA1034        | Bedding            | T6                    |
|      | 2020     | <u>20MA0040</u> | LNN mesenteriales  | T6                    |
|      |          | <u>20MA0041</u> | Jejunum            | T6                    |
|      | 2021     | 21MA1973        | Feces, bulk sample | T6                    |

<sup>a</sup> Genotype of isolates comprises combined of results of three typing methods: (1) mycobacterial interspersed repetitive unit-variable number of tandem repeat (MIRU-VNTR)-typing according to [40] with resulting profiles designated according to INRA Nouzilly MIRU-VNTR (INMV) nomenclature deposited in the INMV database (<http://mac-inmv.tours.inra.fr>), (2) short sequence repeat (SSR) analysis according to [63] with profiles representing the repeat numbers at specific target sites of G1 (locus1), GGT (locus 8), and TGC (locus 9), and (3) SNP based assay according to [38] resulting in assignment to phylogenetic groups. <sup>b</sup> Genotype T4 includes profile: INMV2 / 7-4-5 / Clade 4. <sup>c</sup> Genotype T5 includes profile: INMV3 / 7-4-4 / Clade 4. <sup>d</sup> Genotype T6 includes profile:

INMV16\* / 7-4-4 / Clade 3. INMV16\* is characterized by a specific sequence at MIRU-VNTR locus VNTR 7, explained in the paper. Underlined – isolates originated from the same goat; all other isolates from feces or tissues originated from a different goat. LNN – Lymphonodus.

**Table S3.** *Mycobacterium avium* subsp. *paratuberculosis* isolates (n = 34) from different tissues of 13 goats belonging to herd 1 in Thüringia (Germany) and their respective genotyping results.

| Goat N° | Birth year | Isolate  | Origin                       | Genotype <sup>a</sup> |
|---------|------------|----------|------------------------------|-----------------------|
| 80940   | 2014       | 18MA0229 | Jejunum                      | T1 <sup>b</sup>       |
| 80949   | 2014       | 22MA0306 | Spleen                       | T1                    |
| 80949   | 2014       | 22MA0311 | LNN ileocolici               | T1                    |
| 80949   | 2014       | 22MA0319 | LNN inguinales superficiales | T1                    |
| 80949   | 2014       | 22MA0320 | Jejunum                      | T1                    |
| 80974   | 2014       | 18MA0266 | LNN ileocolici               | T1                    |
| 80993   | 2014       | 18MA0241 | Ileum                        | T1                    |
| 80993   | 2014       | 18MA0242 | LNN mesenteriales            | T1                    |
| 81014   | 2014       | 20MA1134 | Jejunum                      | T1                    |
| 81014   | 2014       | 20MA1142 | LNN colici                   | T1                    |
| 57999   | 2015       | 18MA0199 | Jejunum                      | T1                    |
| 57999   | 2015       | 18MA0204 | LNN ileocolici               | T1                    |
| 58007   | 2015       | 18MA0210 | Ileum                        | T1                    |
| 58007   | 2015       | 18MA0213 | LNN ileocolici               | T1                    |
| 58007   | 2015       | 18MA0214 | Mammary gland                | T1                    |
| 58049   | 2015       | 18MA0250 | Jejunum                      | T1                    |
| 58049   | 2015       | 18MA0252 | Ileum                        | T1                    |
| 58049   | 2015       | 18MA0255 | LNN ileocolici               | T1                    |
| 58050   | 2015       | 18MA0219 | Jejunum                      | T1                    |
| 58050   | 2015       | 18MA0221 | Ileum                        | T1                    |
| 58050   | 2015       | 18MA0224 | LNN ileocolici               | T1                    |
| 58056   | 2015       | 20MA1146 | Jejunum                      | T1                    |
| 58056   | 2015       | 20MA1147 | Jejunum                      | T1                    |
| 45859   | 2017       | 22MA1383 | Jejunum                      | T1                    |

|       |      |          |                   |    |
|-------|------|----------|-------------------|----|
| 45859 | 2017 | 22MA1385 | Ileum             | T1 |
| 45859 | 2017 | 22MA1387 | LNN mesenteriales | T1 |
| 45859 | 2017 | 22MA1388 | LNN ileocolici    | T1 |
| 45925 | 2017 | 22MA0191 | Jejunum           | T1 |
| 45925 | 2017 | 22MA0199 | LNN mesenteriales | T1 |
| 45925 | 2017 | 22MA0204 | LNN hepatici      | T1 |
| 72073 | 2018 | 22MA1395 | Jejunum           | T1 |
| 72073 | 2018 | 22MA1398 | LNN mesenteriales | T1 |
| 72073 | 2018 | 22MA1400 | LNN ileocolici    | T1 |
| 72073 | 2018 | 22MA1404 | LNN hepatici      | T1 |

LNN - Lymphonodi; <sup>a</sup>Genotype of isolates comprises combination of results of three typing methods: (1) mycobacterial interspersed repetitive unit-variable number of tandem repeat (MIRU-VNTR)-typing according to [40] with resulting profiles designated according to INRA Nouzilly MIRU-VNTR (INMV) nomenclature deposited in the INMV database (<http://mac-inmv.tours.inra.fr>), (2) short sequence repeat (SSR) analysis according to [63] with profiles representing the repeat numbers at specific target sites of G1 (locus1), GGT (locus 8), and TGC (locus 9), and (3) SNP-based assay according to [38] resulting in assignment of strains to phylogenetic groups;

<sup>b</sup>Genotype T1 includes profile: INMV1 / 7-4-4 / Clade 9.

**Table S4.** *Mycobacterium avium* subsp. *paratuberculosis* isolates (n = 29) from environmental samples of herd 1 in Thuringia (Germany) and their respective genotyping results

| Isolate  | Sampling N°* | Localization                | Sample material | Genotype <sup>a</sup> |
|----------|--------------|-----------------------------|-----------------|-----------------------|
| 20MA0563 | 1            | Kidding area                | Dust            | T1 <sup>b</sup>       |
| 20MA0580 | 1            | Kidding area                | Bedding         | T1                    |
| 20MA0590 | 1            | Milking parlor              | Bedding         | T1                    |
| 20MA0591 | 1            | Waiting area milking parlor | Bedding         | T1                    |
| 20MA1027 | 1            | Stable entrance front       | Bedding         | T3 <sup>c</sup>       |
| 20MA1028 | 1            | Stable entrance back        | Bedding         | T1                    |
| 20MA1706 | 2            | Kidding area                | Bedding         | T1                    |
| 20MA1707 | 2            | Kidding area                | Bedding         | T1                    |
| 20MA1708 | 2            | Kidding area                | Bedding         | T1                    |
| 21MA0859 | 3            | Milking parlor              | Bedding         | T1                    |
| 21MA0862 | 3            | Kidding area                | Bedding         | T1                    |
| 21MA0863 | 3            | Kidding area                | Bedding         | T1                    |
| 21MA0864 | 3            | Kidding area                | Bedding         | T1                    |
| 21MA0865 | 3            | Kidding area                | Bedding         | T1                    |

---

|          |   |                             |         |    |
|----------|---|-----------------------------|---------|----|
| 21MA2612 | 5 | Waiting area milking parlor | Bedding | T1 |
| 21MA2613 | 5 | Milking parlor              | Bedding | T1 |
| 21MA2614 | 5 | Exit area milking parlor    | Bedding | T1 |
| 21MA2615 | 5 | Stable quadrant 1           | Bedding | T1 |
| 21MA2616 | 5 | Stable quadrant 2           | Bedding | T1 |
| 22MA0157 | 6 | Waiting area milking parlor | Bedding | T1 |
| 22MA0158 | 6 | Milking parlor              | Bedding | T1 |
| 22MA0160 | 6 | Stable quadrant 1           | Bedding | T1 |
| 22MA0161 | 6 | Stable quadrant 2           | Bedding | T1 |
| 22MA0162 | 6 | Stable quadrant 3           | Bedding | T1 |
| 22MA0163 | 6 | Stable quadrant 4           | Bedding | T1 |
| 22MA0700 | 7 | Milking parlor              | Bedding | T1 |
| 22MA0704 | 7 | Stable quadrant 3           | Bedding | T1 |
| 22MA1350 | 8 | Milking parlor              | Bedding | T1 |
| 22MA1353 | 8 | Stable quadrant 2           | Bedding | T1 |

---

<sup>a</sup>Genotype of isolates comprises combined of results of three typing methods: (1) mycobacterial interspersed repetitive unit-variable number of tandem repeat (MIRU-VNTR)-typing according to [40] with resulting profiles designated according to INRA Nouzilly MIRU-VNTR (INMV) nomenclature deposited in the INMV database (<http://mac-inmv.tours.inra.fr>), (2) short sequence repeat (SSR) analysis according to [63] with profiles representing the repeat numbers at specific target sites of G1 (locus1), GGT (locus 8), and TGC (locus 9), and (3) SNP based assay according to [38] resulting in assignment of strains to phylogenetic groups. <sup>b</sup>Genotype T1 includes profile: INMV1 / 7-4-4 / Clade 9. <sup>c</sup>Genotype T3 includes profile: INMV2 / 7-4-4 / Clade 1. Details about environmental sampling were described elsewhere [12].
